# Supplementary material for: Outstanding performance of an invasive alien tree Bischofia javanica relative to native tree species and implications for management of insular primary forests
Source: PeerJ journal article supplement (doi:10.7717/peerj.9573), 2020-07-23
Supplement: TableS1_staff_KT.pdf [file TableS1_staff_KT.pdf]

Table S1 Changes in the number of stems (N) and basal area (BA) of trees (DBH  $\geq$  10 cm) between 1987 and 2006. The 1987 values are from the Shimizu (1994) and the 2006 values are collected by the present study within the former Shimizu plot (60 m  $\times$  50 m). Species are listed in descending order of BA in 1987. Numbers within parentheses after the BA values in 2006 represent the species order based on the BA in 2006. Only *Bischofia javanica* is an alien species. Species order is based on descending order of BA in 1987.

| Species                                               | 1987    |                         | 2006    |                         |
|-------------------------------------------------------|---------|-------------------------|---------|-------------------------|
|                                                       | N (/ha) | BA (m <sup>2</sup> /ha) | N (/ha) | BA (m <sup>2</sup> /ha) |
| <i>Pisonia umbellifera</i>                            | 187     | 36.3                    | 250     | 35.5 (1)                |
| <i>Ardisia sieboldii</i>                              | 797     | 18.6                    | 1120    | 24.7 (2)                |
| <i>Elaeocarpus photiniifolius</i>                     | 63      | 12.0                    | 113     | 18.2 (3)                |
| <i>Planchonella obovata</i> var. <i>obovata</i>       | 30      | 4.4                     | 17      | 1.1 (9)                 |
| <i>Hibiscus glaber</i>                                | 20      | 3.8                     | 37      | 4.1 (4)                 |
| <i>Melia azedarach</i>                                | 10      | 2.5                     | 13      | 3.7 (5)                 |
| <i>Cyathea mertensiana</i>                            | 50      | 1.5                     | 30      | 1.2 (8)                 |
| <i>Psychotria homalosperma</i>                        | 30      | 1.3                     | 17      | 0.3 (11)                |
| <i>Bischofia javanica</i>                             | 17      | 0.9                     | 47      | 2.5 (6)                 |
| <i>Zanthoxylum ailanthoides</i><br>var. <i>inerme</i> | 10      | 0.4                     | 50      | 1.3 (7)                 |
| <i>Callicarpa subpubescens</i>                        | 13      | 0.4                     | 7       | 0.3 (10)                |
| <i>Machilus boninensis</i>                            | 7       | 0.3                     | 13      | 0.2 (13)                |
| <i>Melicope grisea</i> var. <i>grisea</i>             | 7       | 0.1                     | 17      | 0.2 (12)                |
| <i>Ficus iidana</i>                                   | 3       | 0.0                     | 7       | 0.1 (14)                |
| <i>Cyathea spinulosa</i>                              | 3       | 0.0                     | -       | -                       |
| <i>Claoxylon centinarium</i>                          | 3       | 0.0                     | -       | -                       |
| Total                                                 | 1250    | 82.6                    | 1737    | 93.5                    |
