# Supplementary material for: Outstanding performance of an invasive alien tree Bischofia javanica relative to native tree species and implications for management of insular primary forests
Source: PeerJ journal article supplement (doi:10.7717/peerj.9573), 2020-07-23
Supplement: TableS2_staff_KT.pdf [file TableS2_staff_KT.pdf]

Table S2 Typhoons for which a wind velocity of more than  $20 \text{ m s}^{-1}$  was recorded in the Ogasawara Islands between 1987 and 2006. The data is from the Chichi-jima Weather Station (Japan Meteorological Agency, 2018).

| Year | Month | Day | Typhoon No. | Name of Typhoon | Min. atmospheric Pressure (hP <sub>k</sub> ) | Mean wind Velocity ( $\text{m s}^{-1}$ ) | Max. wind Velocity ( $\text{m s}^{-1}$ ) |
|------|-------|-----|-------------|-----------------|----------------------------------------------|------------------------------------------|------------------------------------------|
| 1987 | 9     | 15  | 13          | Freda           | 986.3                                        | 15.5                                     | 21.9                                     |
| 1989 | 10    | 7   | 25          | Colleen         | 994.1                                        | 13.8                                     | 24.4                                     |
| 1991 | 8     | 13  | 10          | Ellie           | 999.5                                        | 4.0                                      | 21.4                                     |
| 1997 | 6     | 13  | 6           | Nestor          | 999.2                                        | 11.7                                     | 30.2                                     |
| 1997 | 9     | 18  | 20          | David           | 982.5                                        | 12.0                                     | 24.9                                     |
| 1997 | 10    | 22  | 24          | Joan            | 994.1                                        | 11.5                                     | 31.8                                     |
| 1997 | 11    | 7   | 25          | Keith           | 1004.2                                       | 10.7                                     | 21.5                                     |
| 2002 | 7     | 24  | 9           | Fengshen        | 986.9                                        | 11.8                                     | 24.6                                     |
| 2002 | 11    | 24  | 25          | Haishen         | 992.2                                        | 6.6                                      | 20.8                                     |
| 2003 | 9     | 29  | 16          | Koppu           | 983.9                                        | 13.8                                     | 31.0                                     |
| 2006 | 9     | 23  | 14          | Yagi            | 992.7                                        | 14.0                                     | 31.5                                     |
| 2006 | 10    | 15  | 18          | Soulik          | 985.6                                        | 13.8                                     | 25.7                                     |
